1  
2  
3  
4  
5  
6  
7  
8  
9  
10  
11  
12  
13  
14  
15  
16  
17

## Zika virus, a new threat for Europe?

Henri Jupille<sup>1</sup>, Gonçalo Seixas<sup>2,3</sup>, Laurence Mousson<sup>1</sup>, Carla A. Sousa<sup>2,3</sup>, Anna-Bella Failloux<sup>1,\*</sup>

<sup>1</sup> Institut Pasteur, Arboviruses and Insect Vectors, Department of Virology, Paris, France

<sup>2</sup> Instituto de Higiene e Medicina Tropical, Unidade de Parasitologia Médica, Universidade Nova de Lisboa, Portugal

<sup>3</sup> Global Health and Tropical Medicine, Instituto de Higiene e Medicina Tropical, Universidade Nova de Lisboa, Portugal

**Short title:** Zika in Europe

\* Corresponding author

Email: [anna-bella.failloux@pasteur.fr](mailto:anna-bella.failloux@pasteur.fr) (ABF)

18 **Abstract**

19 **Background:**

20 Since its emergence in 2007 in Micronesia and Polynesia, the arthropod-borne flavivirus Zika  
21 virus (ZIKV) has spread in the Americas and the Caribbean, following first detection in Brazil in  
22 May 2015. The risk of ZIKV emergence in Europe increases as imported cases are repeatedly  
23 reported. Together with chikungunya virus (CHIKV) and dengue virus (DENV), ZIKV is  
24 transmitted by *Aedes* mosquitoes. Any countries where these mosquitoes are present could be  
25 potential sites for future ZIKV outbreak.

26 **Methodology/Principal Findings:**

27 Mosquito females were challenged with an Asian genotype of ZIKV. Fully engorged mosquitoes  
28 were then maintained in insectary conditions ( $28^{\circ}\pm 1^{\circ}\text{C}$ , 16h:8h light:dark cycle and 80%  
29 humidity). 16-24 mosquitoes from each population were examined at 3, 6, 9 and 14 days post-  
30 infection to estimate the infection, disseminated infection and transmission rates. Based on these  
31 experimental infections, we demonstrated that *Ae. albopictus* from France were not very  
32 susceptible to ZIKV.

33 **Conclusions/Significance:**

34 In combination with the restricted distribution and lower population densities of European *Ae.*  
35 *albopictus*, our results corroborate the low risk for ZIKV to expand into most parts of Europe  
36 with the possible exception of the warmest regions bordering the Mediterranean coastline.

37

38 **Keywords:** *Aedes albopictus*, *Aedes aegypti*, Europe, Zika virus, emergence risk.

39

40 **Author summary**

41

42 In May 2015, local transmission of Zika virus (ZIKV) was reported in Brazil and since then,  
43 more than 1.5 million human cases have been reported in Latin America and the Caribbean. This  
44 arbovirus, primarily found in Africa and Asia, is mainly transmitted by *Aedes* mosquitoes, *Aedes*  
45 *aegypti* and *Aedes albopictus*. Viremic travelers returning from America to European countries  
46 where *Ae. albopictus* is established can become the source for local transmission of ZIKV . In  
47 order to estimate the risk of seeding ZIKV into local mosquito populations, the ability of  
48 European *Ae. aegypti* and *Ae. albopictus* to transmit ZIKV was measured using experimental  
49 infections. We demonstrated that *Ae. albopictus* and *Ae. aegypti* from Europe were not very  
50 susceptible to ZIKV. The threat for a Zika outbreak in Europe should be limited.

51

## 52 **Introduction**

53

54 Zika virus (ZIKV) (genus *Flavivirus*, family *Flaviviridae*) is an emerging arthropod-borne virus

55 transmitted to humans by *Aedes* mosquitoes. ZIKV infection in humans was first observed in

56 Africa in 1952 [1], and can cause a broad range of clinical symptoms presenting as a “dengue-

57 like” syndrome: headache, rash, fever, and arthralgia. In 2007, an outbreak of ZIKV on Yap

58 Island resulted in 73% of the total population becoming infected [2]. Following this, ZIKV

59 continued to spread rapidly with outbreaks in French Polynesia in October 2013 [3], New

60 Caledonia in 2015 [4], and subsequently, Brazil in May 2015 [5, 6]. During this expansion

61 period, the primary transmission vector is considered to have been *Aedes aegypti*, although

62 *Aedes albopictus* could potentially serve as a secondary transmission vector [7]. As Musso et al.

63 [8] observed, the pattern of ZIKV emergence from Africa, throughout Asia, to its subsequent

64 arrival in South America and the Caribbean closely resembles the emergence of Chikungunya

65 virus (CHIKV). In Europe, returning ZIKV-viremic travelers may become a source of local

66 transmission in the presence of *Aedes* mosquitoes, *Ae. albopictus* in Continental Europe and *Ae.*

67 *aegypti* in the Portuguese island of Madeira. *Ae. albopictus* originated from Asia and was

68 recorded for the first time in Europe in Albania in 1979 [9], then in Italy in 1990 [10]. It is now

69 present in all European countries around the Mediterranean Sea [11]. This mosquito was

70 implicated as a vector of CHIKV and DENV in Europe [12]. On the other hand, *Ae. aegypti*

71 disappeared after the 1950s with the improvement of hygiene and anti-malaria vector control.

72 This mosquito reinvaded European territory, Madeira island, in 2005 [13], and around the Black

73 Sea in southern Russia, Abkhazia, and Georgia in 2004 [11]. The species was responsible for

74 outbreaks of yellow fever in Italy in 1804 [14] and dengue in Greece in 1927–1928 [15]. To

75 assess the possible risk of ZIKV transmission in Europe, we compared the relative vector  
76 competence of European *Ae. aegypti* and *Ae. albopictus* populations to the Asian genotype of  
77 ZIKV.

78

79

## 80 **Materials and Methods**

81

### 82 **Ethics Statement**

83 The Institut Pasteur animal facility has received accreditation from the French Ministry of  
84 Agriculture to perform experiments on live animals in compliance with the French and European  
85 regulations on care and protection of laboratory animals. This study was approved by the  
86 Institutional Animal Care and Use Committee (IACUC) at the Institut Pasteur. No specific  
87 permits were required for the described field studies in locations that are not protected in any  
88 way and did not involve endangered or protected species.

89

### 90 **Mosquitoes**

91 Four populations of mosquitoes (two populations of *Ae. aegypti*: Funchal and Paul do Mar,  
92 collected on island of Madeira and two populations of *Ae. albopictus*: Nice and Bar-sur-Loup in  
93 France) were collected using ovitraps. Eggs were immersed in dechlorinated tap water for  
94 hatching. Larvae were distributed in pans of 150-200 individuals and supplied with 1 yeast tablet  
95 dissolved in 1L of water every 48 hours. All immature stages were maintained at  $28^{\circ}\text{C} \pm 1^{\circ}\text{C}$ .

96 After emergence, adults were given free access to a 10% sucrose solution and maintained at  
97  $28^{\circ}\text{C} \pm 1^{\circ}\text{C}$  with 70% relative humidity and a 16:8 light/dark cycle. The F1 generation of *Ae.*  
98 *aegypti* from Madeira and F7-8 generation of *Ae. albopictus* from France were used for  
99 experimental infections.

100

### 101 **Viral strain**

102 The ZIKV strain (NC-2014-5132) originally isolated from a patient in April 2014 in New  
103 Caledonia was used to infect mosquitoes. The viral stock used was subcultured five times on  
104 Vero cells prior to the infectious blood-meal. The NC-2014-5132 strain is phylogenetically  
105 closely related to the ZIKV strains circulating in the South Pacific region, Brazil [5] and French  
106 Guiana [16].

107

### 108 **Oral Infection of Mosquitoes**

109 Infectious blood-meals were provided using a titer of  $10^7$  TCID<sub>50</sub>/mL. Seven-day old mosquitoes  
110 were fed on blood-meals containing two parts washed rabbit erythrocytes to one part viral  
111 suspension supplemented with ATP at a final concentration of 5 mM. Engorged females were  
112 transferred to cardboard containers with free access to 10% sucrose solution and maintained at  
113  $28^{\circ}\text{C}$  and 70% relative humidity with a 16:8 light/dark cycle. 16-24 female mosquitoes from  
114 each population were analyzed at 3, 6, 9, and 14 days post-infection (dpi) to estimate the  
115 infection, disseminated infection and transmission rates. Briefly, legs and wings were removed  
116 from each mosquito followed by insertion of the proboscis into a 20  $\mu\text{L}$  tip containing 5  $\mu\text{L}$  FBS  
117 for 20 minutes. The saliva-containing FBS was expelled into 45  $\mu\text{L}$  serum free L-15 media

118 (Gibco), and stored at -80°C. Following salivation, mosquitoes were decapitated and head and  
119 body (thorax and abdomen) were homogenized separately in 300 µL L-15 media supplemented  
120 with 3% FBS using a Precellys homogenizer (Bertin Technologies) then stored at -80°C.  
121 Infection rate was measured as the percentage of mosquitoes with infected bodies among the  
122 total number of analyzed mosquitoes. Disseminated infection rate was estimated as the  
123 percentage of mosquitoes with infected heads (i.e., the virus had successfully crossed the midgut  
124 barrier to reach the mosquito hemocoel) among the total number of mosquitoes with infected  
125 bodies. Transmission rate was calculated as the overall proportion of females with infectious  
126 saliva among those with disseminated infection. Samples were titrated by plaque assay in Vero  
127 cells.

128

### 129 **Virus Quantification**

130 For head/body homogenates and saliva samples, Vero E6 cell monolayers were inoculated with  
131 serial 10-fold dilutions of virus-containing samples and incubated for 1 hour at 37°C followed by  
132 an overlay consisting of DMEM 2X, 2% FBS, antibiotics and 1% agarose. At 7 dpi, overlay was  
133 removed and cells were fixed with crystal violet (0.2% Crystal Violet, 10% Formaldehyde, 20%  
134 ethanol) and positive/negative screening was performed for cytopathic effect (body  
135 homogenates) or plaques were enumerated (head homogenates and saliva samples). Vero E6  
136 cells (ATCC CRL-1586) were maintained in DMEM (Gibco) supplemented with 10% fetal  
137 bovine serum (Eurobio), Penicillin and Streptomycin, and 0.29 mg/mL l-glutamine.

138

### 139 **Statistical analysis**

140 All statistical tests were conducted using the STATA software (StataCorp LP, Texas, USA)  
141 using Fisher's exact test and P-values > 0.05 were considered non-significant.

142

143

## 144 **Results**

### 145 ***Aedes aegypti* from Madeira transmit ZIKV efficiently**

146 To test whether *Ae. aegypti* from a European territory were able to transmit ZIKV, we analyzed  
147 the vector competence of two *Ae. aegypti* populations collected on the island of Madeira based  
148 on three parameters: viral infection of the mosquito midgut, viral dissemination to secondary  
149 organs, and transmission potential, analyzed at 3, 6, 9, and 14 dpi. The two populations presented  
150 similar infection and disseminated infection (Figure) ( $P > 0.05$ ) with the highest rates measured  
151 at 9 dpi and 9-14 dpi, respectively. Only mosquitoes presenting an infection (i.e. infected  
152 midgut) were analyzed for viral dissemination and only mosquitoes with a disseminated infection  
153 were assessed for transmission success. Thus, only *Ae. aegypti* Funchal were able to transmit  
154 ZIKV at 9 and 14 dpi (Figure).

155

### 156 **French *Ae. albopictus* showed significantly reduced competence to transmit ZIKV**

157 To determine if *Ae. albopictus* present in continental Europe were able to sustain local  
158 transmission of ZIKV as previously observed with CHIKV and DENV, we evaluated the vector  
159 competence of two *Ae. albopictus* populations collected in Nice and Bar-sur-Loup in the South  
160 of France. When compared with *Ae. aegypti*, the two *Ae. albopictus* populations showed



161 equivalent but reduced infection and disseminated infection (Figure) ( $P > 0.05$ ) with highest rates  
162 observed at 6 dpi and 14 dpi, respectively. Only one individual among two *Ae. albopictus* Bar-  
163 sur-Loup having ensured viral dissemination was able to transmit ZIKV at 14 dpi (Figure).

164 In summary, virus titers measured in *Ae. albopictus* were much lower than those detected in *Ae.*  
165 *aegypti*. Virus dissemination through *Ae. aegypti* was noticeably superior and consequently, viral  
166 loads in saliva were higher for *Ae. aegypti* (1500 pfu compared with 2 pfu at 9 dpi; data not  
167 shown). Moreover, transmission of ZIKV occurred earlier and in a much higher proportion of  
168 *Ae. aegypti* when compared with *Ae. albopictus*.

169

170

## 171 **Discussion**

172 ZIKV could be transmitted, spread and maintained in Europe either via (i) Madeira where the  
173 main vector *Ae. aegypti* has been established since 2005 or (ii) Continental Europe where *Ae.*  
174 *albopictus* is known to have been present since 1979 [11]. We demonstrated that ZIKV was  
175 amplified and transmitted efficiently by European *Ae. aegypti* from Madeira. This contrasts with  
176 the much lower vector competence for ZIKV amplification and transmission of French *Ae.*  
177 *albopictus*. Taking these observations and the overall average lower temperatures of most  
178 regions of Europe into account, the risk of major outbreaks of Zika fever in most areas of  
179 Europe, at least for the immediate future, appears to be relatively low.

180

181 Our results highlight the potential risk for ZIKV transmission on Madeira where two main  
182 factors are present: the presence of the main vector, *Ae. aegypti* introduced in 2005 [17] and  
183 imported cases from Brazil with which Madeira, an autonomous region of Portugal, maintains  
184 active exchanges of goods and people sharing the same language. Thus Madeira Island could be  
185 considered as a stepping stone for an introduction of ZIKV into Europe.

186 Autochthonous cases of CHIKV and DENV have been reported in Europe since 2007:  
187 CHIKV in Italy in 2007, South France in 2010, 2014, and DENV in South France in 2010, 2013,  
188 2015, and Croatia in 2010 [18]. The invasive species *Ae. albopictus* first detected in Europe in  
189 1979 [9] has played a central role in this transmission [18]. Thus, there might be a risk of a  
190 similar establishment of ZIKV in Europe upon the return of viremic travelers [19, 20]. We  
191 showed that *Ae. albopictus* from South France were less competent for ZIKV infection requiring  
192 14 days to be excreted in the mosquito saliva after infection. Therefore, we can suggest that the  
193 Asian tiger mosquito from Southern France and more widely, Europe, are less suitable to sustain  
194 local transmission of ZIKV compared to CHIKV and perhaps, DENV.

195 Considering the extensive airline travel between Latin America and Europe, the risk for  
196 local transmission of ZIKV in the European area where the mosquito *Ae. albopictus* is widely  
197 distributed, is assumed to be minimal based on our studies of vector competence. Nevertheless,  
198 reinforcement of surveillance and control of mosquitoes should remain a strong priority in  
199 Europe since *Aedes* mosquitoes also transmit DENV and CHIKV and virus adaptation to new  
200 vectors cannot be excluded, as previously observed with CHIKV in La Reunion [21, 22].

201

202

203 **Acknowledgments**

204 The authors thank Myrielle Dupont-Rouzeyrol for providing the ZIKV strain. We are grateful to  
205 Marie Vazeille for technical assistance in performing mosquito titrations. We warmly thank  
206 Xavier de Lamballerie, Marc Lecuit, Anavaj Sakuntabhai, Richard Paul and Alain Kohl for their  
207 support. We also thank Pascal Delauney, Christophe Lagneau and Gregory Lambert for mosquito  
208 collections in South of France. We deeply thank Ana Clara Silva for the work developed in  
209 Madeira.

210

### 211 **Competing interests**

212 We declare that we have no competing interests.

213

214

215 **Figure Legend**

216 **Figure.** *Ae. aegypti* from Madeira Island and *Ae. albopictus* from France were assessed for  
217 **viral infection, dissemination, and transmission at days 3, 6, 9, 14 after infection with ZIKV**  
218 **provided at a titer of  $10^7$  TCID<sub>50</sub>/mL.** 16-24 mosquitoes were sampled each day. Infection  
219 rates were measured as the percentage of mosquitoes with infected bodies among the total  
220 number of analyzed mosquitoes. Disseminated infection rates were estimated as the percentage  
221 of mosquitoes with infected heads (i.e., the virus has successfully crossed the midgut barrier to  
222 reach the hemocoel) among the total number of mosquitoes with infected bodies. The  
223 transmission rate was calculated as the overall proportion of females with infectious saliva  
224 among those with disseminated ZIKV infection. AE = *Ae. aegypti*; AL = *Ae. albopictus*. In red,  
225 countries where ZIKV has been isolated.

226

227

## 228 References

- 229 1. Dick GW, Kitchen SF, Hadow AJ. Zika virus. I. Isolations and serological specificity. *Trans R Soc Trop*  
230 *Med Hyg* **1952**; 46:509-20.
- 231 2. Duffy MR, Chen TH, Hancock WT, et al. Zika virus outbreak on Yap Island, Federated States of  
232 Micronesia. *N Engl J Med* **2009**; 360:2536-43.
- 233 3. Cao-Lormeau VM, Roche C, Teissier A, et al. Zika virus, French polynesia, South pacific, 2013. *Emerg*  
234 *Infect Dis* **2014**; 20:1085-6.
- 235 4. Dupont-Rouzeyrol M, O'Connor O, Calvez E, et al. Co-infection with Zika and dengue viruses in 2  
236 patients, New Caledonia, 2014. *Emerg Infect Dis* **2015**; 21:381-2.
- 237 5. Zanoluca C, de Melo VC, Mosimann AL, Dos Santos GI, Dos Santos CN, Luz K. First report of  
238 autochthonous transmission of Zika virus in Brazil. *Mem Inst Oswaldo Cruz* **2015**; 110:569-72.
- 239 6. Campos GS, Bandeira AC, Sardi SI. Zika Virus Outbreak, Bahia, Brazil. *Emerg Infect Dis* **2015**; 21:1885-  
240 6.
- 241 7. Wong PS, Li MZ, Chong CS, Ng LC, Tan CH. *Aedes (Stegomyia) albopictus* (Skuse): a potential vector of  
242 Zika virus in Singapore. *PLoS Negl Trop Dis* **2013**; 7:e2348.
- 243 8. Musso D, Cao-Lormeau VM, Gubler DJ. Zika virus: following the path of dengue and chikungunya?  
244 *Lancet* **2015**; 386:243-4.
- 245 9. Adhami J, Reiter P. Introduction and establishment of *Aedes (Stegomyia) albopictus* skuse (Diptera:  
246 Culicidae) in Albania. *J Am Mosq Control Assoc* **1998**; 14:340-3.
- 247 10. Sabatini A, Raineri V, Trovato G, Coluzzi M. [*Aedes albopictus* in Italy and possible diffusion of the  
248 species into the Mediterranean area]. *Parassitologia* **1990**; 32:301-4.
- 249 11. Medlock JM, Hansford KM, Schaffner F, et al. A review of the invasive mosquitoes in Europe:  
250 ecology, public health risks, and control options. *Vector Borne Zoonotic Dis* **2012**; 12:435-47.
- 251 12. Vega-Rua A, Zouache K, Caro V, et al. High efficiency of temperate *Aedes albopictus* to transmit  
252 chikungunya and dengue viruses in the Southeast of France. *PLoS One* **2013**; 8:e59716.
- 253 13. Nene V, Wortman JR, Lawson D, et al. Genome sequence of *Aedes aegypti*, a major arbovirus vector.  
254 *Science* **2007**; 316:1718-23.
- 255 14. Levre E. The yellow fever outbreak of 1804 in Leghorn. *Ann Ig* **2002**; 14:153-7.
- 256 15. Rosen L. Dengue in Greece in 1927 and 1928 and the pathogenesis of dengue hemorrhagic fever:  
257 new data and a different conclusion. *Am J Trop Med Hyg* **1986**; 35:642-53.
- 258 16. Antoine Enfissi JC, Jimmy Roosblad, Mirdad Kazanji, Dominique Rousset Zika virus genome from the  
259 Americas. *The Lancet* **2015**; 7 janvier 2016.
- 260 17. Margarita Y SGA, Lencastre I, Silva AC, Novo T, Sousa C, et al. First record of *Aedes (Stegomia)*  
261 *aegypti* (Linnaeus, 1762) (Diptera, Culicidae) in Madeira Island – Portugal. *Acta Parasitológica*  
262 *Portuguesa* **2006**; 13:59-61.
- 263 18. Rezza G. Dengue and chikungunya: long-distance spread and outbreaks in naive areas. *Pathog Glob*  
264 *Health* **2014**; 108:349-55.
- 265 19. Tappe D, Rissland J, Gabriel M, et al. First case of laboratory-confirmed Zika virus infection imported  
266 into Europe, November 2013. *Euro Surveill* **2014**; 19.
- 267 20. Zammarchi L, Tappe D, Fortuna C, et al. Zika virus infection in a traveller returning to Europe from  
268 Brazil, March 2015. *Euro Surveill* **2015**; 20.
- 269 21. Tsetsarkin KA, Vanlandingham DL, McGee CE, Higgs S. A single mutation in chikungunya virus affects  
270 vector specificity and epidemic potential. *PLoS Pathog* **2007**; 3:e201.
- 271 22. Vazeille M, Moutailler S, Coudrier D, et al. Two Chikungunya isolates from the outbreak of La  
272 Reunion (Indian Ocean) exhibit different patterns of infection in the mosquito, *Aedes albopictus*. *PLoS*  
273 *One* **2007**; 2:e1168.



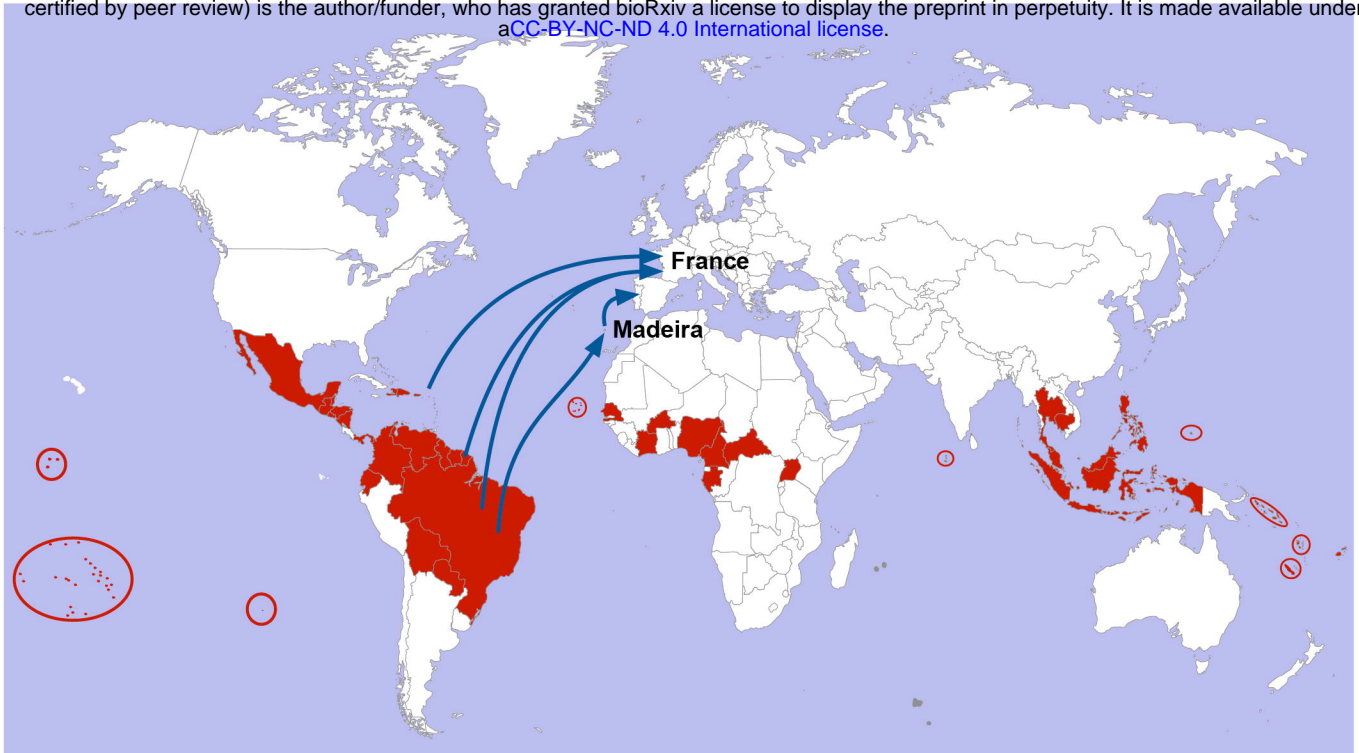

### Madeira

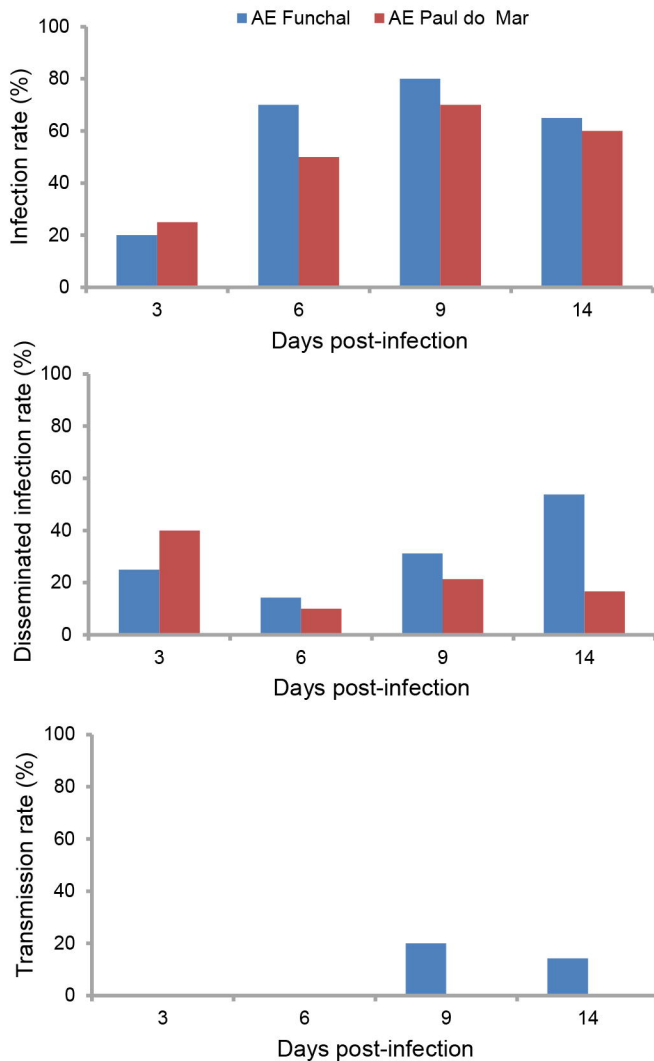

### France

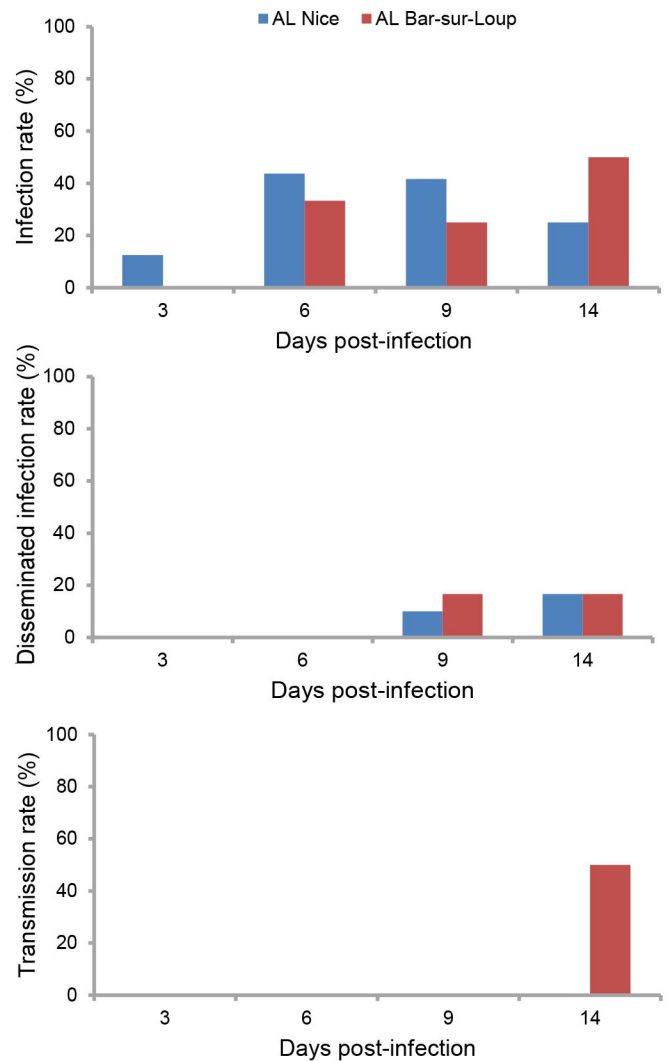

Source: https://www.biorxiv.org/content/10.1101/048454v1.full.pdf
